# Supplementary material for: Approved HIV reverse transcriptase inhibitors in the past decade
Source: PubMed Central journal article supplement — Acta Pharm Sin B. 2021 Nov 16;12(4):1567–90. doi: 10.1016/j.apsb.2021.11.009 (PMC9279714; doi:10.1016/j.apsb.2021.11.009), 2021-11-16
Supplement: mmc1.pdf [file mmc1.pdf]

## **Supporting Information for**

### **Review**

#### **Approved HIV reverse transcriptase inhibitors in the past decade**

Guangdi Li<sup>a</sup>, Yali Wang<sup>a,\*</sup>, Erik De Clercq<sup>b,\*</sup>

<sup>a</sup>*Hunan Provincial Key Laboratory of Clinical Epidemiology, Xiangya School of Public Health, Central South University, Changsha 410078, China*

<sup>b</sup>*Rega Institute for Medical Research, Department of Microbiology, Immunology and Transplantation, KU Leuven, Leuven B-3000, Belgium*

Received 12 August 2021; received in revised form 13 October 2021; accepted

\*Corresponding authors. Tel. +32 1637 3755, fax: +32 1637 3755.

E-mail addresses: [liguangdi.research@gmail.com](mailto:liguangdi.research@gmail.com) (Guangdi Li), [wangyali@csu.edu.cn](mailto:wangyali@csu.edu.cn) (Yali Wang), [erik.declercq@kuleuven.be](mailto:erik.declercq@kuleuven.be) (Erik De Clercq).

**Table S1-1** The frequency of adverse events of RTI-based regimens in phase 2/3 clinical trials.

| Regimen              | ClinicalTrials.gov Identifier | Ref. | Phase | Patients | Drug-related adverse events | Grade 3-4 adverse events | Diarrhoea     |
|----------------------|-------------------------------|------|-------|----------|-----------------------------|--------------------------|---------------|
| TDF+FTC+RPV          | NCT02345252                   | [1]  | 3     | VS       | 12% (37/314)                | 3% (10/314)              | 8% (26/314)   |
|                      | NCT00540449                   | [2]  | 3     | TN       | NA                          | NA                       | NA            |
|                      | NCT01309243                   | [3]  | 3     | TN       | NA                          | NA                       | NA            |
| TAF+FTC+RPV          | NCT02345226                   | [4]  | 3     | VS       | 13% (56/438)                | 6% (27/438)              | 5% (21/438)   |
|                      | NCT02345252                   | [1]  | 3     | VS       | 6% (20/316)                 | 5% (17/316)              | 7% (23/316)   |
| DTG+RPV              | NCT02429791<br>NCT02422797    | [5]  | 3     | VS       | 19% (97/513)                | 6% (32/513)              | 6% (32/513)   |
| RPV+CAB<br>(monthly) | NCT02951052                   | [6]  | 3     | VS       | 29% (88/308)                | 5% (14/308)              | 1% (2/308)    |
|                      | NCT02938520                   | [7]  | 3     | VS       | 28% (79/283)                | 8% (22/283)              | 11% (32/283)  |
|                      | NCT02120352                   | [8]  | 3     | VS       | NA                          | NA                       | NA            |
|                      | NCT03299049                   | [9]  | 3     | VS       | NA                          | 9.4% (49/523)            | 7% (37/523)   |
| DOR+TDF+3TC          | NCT02275780                   | [10] | 3     | TN       | NA                          | NA                       | 5% (21/333)   |
|                      | NCT02403674                   | [11] | 3     | TN       | 31% (113/364)               | NA                       | 11% (39/364)  |
|                      | NCT02397096                   | [12] | 3     | VS       | 19.5% (87/447)              | NA                       | NA            |
| TAF+FTC+EVG/c        | NCT01497899                   | [13] | 2     | TN       | NA                          | NA                       | 16% (18/112)  |
|                      | NCT01780506<br>NCT01797445    | [14] | 3     | TN       | 40%                         | NA                       | 17% (147/866) |
|                      | NCT01705574                   | [15] | 3     | VS       | 11.3% (18/159)              | 6.3% (10/159)            | NA            |
|                      | NCT01815736                   | [16] | 3     | VS       | 21% (204/959)               | 9% (84/959)              | 10% (96/959)  |
|                      | NCT02616783                   | [17] | 3     | VS       | 20% (22/110)                | 9% (9/110)               | 7% (8/110)    |
| TAF+FTC+BIC          | NCT02603120                   | [18] | 3     | VS       | 8% (23/282)                 | 6% (16/282)              | 9% (24/282)   |
|                      | NCT02652624                   | [19] | 3     | VS       | 9% (20/234)                 | 5% (11/234)              | NA            |
|                      | NCT03110380                   | [20] | 3     | VS       | 14% (41/284)                | 8% (23/284)              | 8% (23/284)   |
|                      | NCT02603107                   | [21] | 3     | VS       | 19% (54/290)                | 4% (13/290)              | 8% (24/290)   |
|                      | NCT02607956                   | [22] | 3     | TN       | 18% (57/320)                | NA                       | 12% (37/320)  |
|                      | NCT02607930                   | [23] | 3     | TN       | 26% (82/314)                | 7% (23/314)              | 13% (40/314)  |
|                      | NCT02397694                   | [24] | 2     | TN       | NA                          | NA                       | 12% (8/65)    |
| TAF+FTC+DRV/c        | NCT02269917                   | [25] | 3     | VS       | 18% (138/763)               | 7% (52/763)              | 8% (60/763)   |
|                      | NCT01565850                   | [26] | 2     | TN       | NA                          | NA                       | 21% (22/103)  |
|                      | NCT02431247                   | [27] | 3     | TN       | 35% (126/362)               | 5% (19/362)              | 20% (71/362)  |
| TAF+FTC+DTG          | NCT03122262                   | [28] | 3     | TN       | NA                          | NA                       | NA            |
|                      | NCT02397694                   | [24] | 2     | TN       | NA                          | NA                       | 12% (4/33)    |
|                      | NCT02607956                   | [22] | 3     | TN       | 26% (83/325)                | NA                       | 12% (39/325)  |
|                      | NCT03110380                   | [20] | 3     | VS       | 10% (28/281)                | 5% (13/281)              | 11% (32/281)  |
| TDF+FTC+EVG/c        | NCT01095796                   | [29] | 3     | TN       | NA                          | NA                       | 23% (80/348)  |
|                      | NCT01106586                   | [30] | 3     | TN       | NA                          | NA                       | 22% (77/353)  |
|                      | NCT01780506<br>NCT01797445    | [14] | 3     | TN       | 42%                         | NA                       | 19% (164/867) |
|                      | NCT01497899                   | [13] | 2     | TN       | NA                          | NA                       | 16% (9/58)    |
|                      | NCT02616783                   | [17] | 3     | VS       | 2% (1/56)                   | 2% (1/56)                | 4% (2/56)     |
| DTG+3TC              | NCT02831673<br>NCT02831764    | [31] | 3     | TN       | 18% (126/716)               | NA                       | 9% (68/716)   |
|                      | NCT02263326                   | [32] | 3     | VS       | NA                          | NA                       | NA            |
|                      | NCT03446573                   | [33] | 3     | VS       | 12.2% (45/369)              | NA                       | 8.1% (30/369) |
| ABC+3TC+DTG          | NCT01263015                   | [34] | 3     | TN       | NA                          | NA                       | 5% (21/414)   |
|                      | NCT02607930                   | [23] | 3     | TN       | 40% (127/315)               | 8% (24/315)              | 13% (41/315)  |

|  |             |      |   |    |              |             |             |
|--|-------------|------|---|----|--------------|-------------|-------------|
|  | NCT02603120 | [18] | 3 | VS | 16% (44/281) | 4% (10/281) | 5% (14/281) |
|  | NCT02938520 | [7]  | 3 | VS | 10% (28/283) | 4% (11/283) | 9% (25/283) |
|  | NCT02105987 | [35] | 3 | VS | 22% (60/275) | 3% (9/275)  | 7% (20/275) |

**Table S1-2** The frequency of adverse events of RTI-based regimens in phase 2/3 clinical trials.

| Regimen           | ClinicalTrials.gov Identifier | Ref. | Upper respiratory tract infection | Nasopharyngitis | Bronchitis  | Headache      | Insomnia      |
|-------------------|-------------------------------|------|-----------------------------------|-----------------|-------------|---------------|---------------|
| TDF+FTC+RPV       | NCT02345252                   | [1]  | 8% (26/314)                       | 8% (24/314)     | 6% (18/314) | 5% (17/314)   | NA            |
|                   | NCT00540449                   | [2]  | NA                                | NA              | NA          | NA            | NA            |
|                   | NCT01309243                   | [3]  | NA                                | NA              | NA          | 12% (49/394)  | 9.6% (38/394) |
| TAF+FTC+RPV       | NCT02345226                   | [4]  | 10% (44/438)                      | 8% (34/438)     | NA          | 6% (24/438)   | NA            |
|                   | NCT02345252                   | [1]  | 9% (27/316)                       | 7% (22/316)     | 4% (12/316) | 5% (15/316)   | NA            |
| DTG+RPV           | NCT02429791<br>NCT02422797    | [5]  | 5% (24/513)                       | 10% (49/513)    | 4% (23/513) | 8% (41/513)   | 3% (17/513)   |
| RPV+CAB (monthly) | NCT02951052                   | [6]  | 0% (0/308)                        | 0% (0/308)      | NA          | 4% (11/308)   | NA            |
|                   | NCT02938520                   | [7]  | 13% (38/283)                      | 20% (56/283)    | NA          | 14% (39/283)  | NA            |
|                   | NCT02120352                   | [8]  | NA                                | NA              | NA          | NA            | NA            |
|                   | NCT03299049                   | [9]  | 14% (71/523)                      | 14% (74/523)    | NA          | 7% (36/523)   | NA            |
| DOR+TDF+3TC       | NCT02275780                   | [10] | NA                                | NA              | NA          | 6% (23/333)   | NA            |
|                   | NCT02403674                   | [11] | 9% (33/364)                       | 11% (39/364)    | NA          | 13% (47/364)  | 5% (19/364)   |
|                   | NCT02397096                   | [12] | NA                                | 7.4% (33/447)   | NA          | 6.5% (29/447) | NA            |
| TAF+FTC+EVG/c     | NCT01497899                   | [13] | 15% (17/112)                      | 6% (7/112)      | 6% (7/112)  | 10% (11/112)  | 4% (4/112)    |
|                   | NCT01780506<br>NCT01797445    | [14] | 11% (99/866)                      | 9% (78/866)     | NA          | 14% (124/866) | 7% (57/866)   |
|                   | NCT01705574                   | [15] | 12% (19/159)                      | NA              | NA          | 9.4% (15/159) | NA            |
|                   | NCT01815736                   | [16] | 16% (151/959)                     | 9% (88/959)     | 6% (58/959) | 7% (69/959)   | 5% (50/959)   |
|                   | NCT02616783                   | [17] | NA                                | NA              | 4% (4/110)  | NA            | NA            |
| TAF+FTC+BIC       | NCT02603120                   | [18] | 10% (29/282)                      | 7% (20/282)     | NA          | 7% (19/282)   | 3% (8/282)    |
|                   | NCT02652624                   | [19] | 6% (15/234)                       | 8% (18/234)     | NA          | 6% (13/234)   | NA            |
|                   | NCT03110380                   | [20] | 7% (20/284)                       | 11% (32/284)    | 5% (14/284) | 5% (13/284)   | 6% (18/284)   |
|                   | NCT02603107                   | [21] | 7% (21/290)                       | 7% (21/290)     | NA          | 12% (35/290)  | NA            |
|                   | NCT02607956                   | [22] | 5% (15/320)                       | 7% (22/320)     | NA          | 13% (40/320)  | 5% (16/320)   |
|                   | NCT02607930                   | [23] | 6% (20/314)                       | 7% (23/314)     | 3% (10/314) | 11% (36/314)  | 4% (14/314)   |
|                   | NCT02397694                   | [24] | 8% (5/65)                         | NA              | NA          | 8% (5/65)     | NA            |
| TAF+FTC+DRV/c     | NCT02269917                   | [25] | 11% (81/763)                      | 11% (81/763)    | NA          | 8% (58/763)   | NA            |
|                   | NCT01565850                   | [26] | 16% (16/103)                      | 5% (5/103)      | 9% (9/103)  | 7% (7/103)    | 6% (6/103)    |
|                   | NCT02431247                   | [27] | 6% (20/362)                       | 11% (40/362)    | 4% (14/362) | 13% (47/362)  | NA            |
| TAF+FTC+DTG       | NCT03122262                   | [28] | NA                                | NA              | NA          | NA            | NA            |
|                   | NCT02397694                   | [24] | 0% (0/33)                         | NA              | NA          | 3% (1/33)     | NA            |
|                   | NCT02607956                   | [22] | 7% (23/325)                       | 10% (31/325)    | NA          | 12% (40/325)  | 4% (14/325)   |
|                   | NCT03110380                   | [20] | 11% (30/281)                      | 10% (28/281)    | 4% (11/281) | 8% (23/281)   | 4% (11/281)   |
| TDF+FTC+EVG/c     | NCT01095796                   | [29] | 14% (48/348)                      | NA              | NA          | 14% (49/348)  | 9% (30/348)   |
|                   | NCT01106586                   | [30] | 15% (54/353)                      | NA              | NA          | 15% (53/353)  | NA            |
|                   | NCT01780506<br>NCT01797445    | [14] | 13% (109/867)                     | 9% (80/867)     | NA          | 13% (108/867) | 6% (48/867)   |
|                   | NCT01497899                   | [13] | 21% (12/58)                       | 3% (2/58)       | 5% (3/58)   | 14% (8/58)    | 7% (4/58)     |
|                   | NCT02616783                   | [17] | NA                                | NA              | 11% (6/56)  | NA            | NA            |

|             |                            |      |               |              |              |               |             |
|-------------|----------------------------|------|---------------|--------------|--------------|---------------|-------------|
| DTG+3TC     | NCT02831673<br>NCT02831764 | [31] | 8% (56/716)   | 8% (55/716)  | 4% (28/716)  | 10% (71/716)  | 4% (27/716) |
|             | NCT02263326                | [32] | NA            | NA           | NA           | NA            | NA          |
|             | NCT03446573                | [33] | 8.4% (31/369) | 12% (43/369) | 2.2% (8/369) | 6.5% (24/369) | NA          |
| ABC+3TC+DTG | NCT01263015                | [34] | NA            | NA           | 2% (8/414)   | 3% (12/414)   | 4% (17/414) |
|             | NCT02607930                | [23] | 11% (34/315)  | 9% (29/315)  | 5% (16/315)  | 14% (43/315)  | 6% (20/315) |
|             | NCT02603120                | [18] | 10% (27/281)  | 8% (22/281)  | NA           | 7% (21/281)   | 5% (14/281) |
|             | NCT02938520                | [7]  | 10% (28/283)  | 17% (48/283) | NA           | 7% (21/283)   | NA          |
|             | NCT02105987                | [35] | 13% (35/275)  | 5% (13/275)  | NA           | 6% (17/275)   | 5% (14/275) |

**Table S1-3** The frequency of adverse events of RTI-based regimens in phase 2/3 clinical trials.

| Regimen              | ClinicalTrials.gov Identifier | Ref. | Fatigue      | Arthralgia  | Back pain     | Rash          |
|----------------------|-------------------------------|------|--------------|-------------|---------------|---------------|
| TDF+FTC+RPV          | NCT02345252                   | [1]  | NA           | NA          | NA            | NA            |
|                      | NCT00540449                   | [2]  | NA           | NA          | NA            | NA            |
|                      | NCT01309243                   | [3]  | NA           | NA          | NA            | 6.1% (24/394) |
| TAF+FTC+RPV          | NCT02345226                   | [4]  | NA           | 5% (20/438) | NA            | NA            |
|                      | NCT02345252                   | [1]  | NA           | NA          | NA            | NA            |
| DTG+RPV              | NCT02429791<br>NCT02422797    | [5]  | NA           | 4% (21/513) | 3% (15/513)   | NA            |
| RPV+CAB<br>(monthly) | NCT02951052                   | [6]  | 4% (11/308)  | NA          | 1% (2/308)    | NA            |
|                      | NCT02938520                   | [7]  | NA           | NA          | 8% (22/283)   | NA            |
|                      | NCT02120352                   | [8]  | NA           | NA          | NA            | NA            |
|                      | NCT03299049                   | [9]  | 6% (33/523)  | NA          | 6% (29/523)   | NA            |
| DOR+TDF+3TC          | NCT02275780                   | [10] | 5% (18/333)  | NA          | NA            | 2% (8/333)    |
|                      | NCT02403674                   | [11] | 6% (21/364)  | NA          | NA            | 5% (17/364)   |
|                      | NCT02397096                   | [12] | NA           | NA          | NA            | NA            |
| TAF+FTC+EVG/c        | NCT01497899                   | [13] | 14% (16/112) | NA          | 3% (3/112)    | 8% (9/112)    |
|                      | NCT01780506<br>NCT01797445    | [14] | 8% (71/866)  | 7% (61/866) | 7% (60/866)   | 6% (55/866)   |
|                      | NCT01705574                   | [15] | NA           | NA          | 6.9% (11/159) | NA            |
|                      | NCT01815736                   | [16] | NA           | 6% (59/959) | 5% (52/959)   | NA            |
|                      | NCT02616783                   | [17] | NA           | 6% (7/110)  | NA            | NA            |
| TAF+FTC+BIC          | NCT02603120                   | [18] | NA           | 7% (19/282) | NA            | NA            |
|                      | NCT02652624                   | [19] | NA           | NA          | NA            | NA            |
|                      | NCT03110380                   | [20] | 7% (21/284)  | 6% (16/284) | 5% (15/284)   | NA            |
|                      | NCT02603107                   | [21] | NA           | 4% (12/290) | 4% (13/290)   | NA            |
|                      | NCT02607956                   | [22] | 6% (19/320)  | 5% (16/320) | 3% (11/320)   | NA            |
|                      | NCT02607930                   | [23] | 6% (19/314)  | 4% (11/314) | NA            | NA            |
|                      | NCT02397694                   | [24] | 6% (4/65)    | 6% (4/65)   | 6% (4/65)     | NA            |
| TAF+FTC+DRV/c        | NCT02269917                   | [25] | NA           | NA          | 7% (54/763)   | NA            |
|                      | NCT01565850                   | [26] | 14% (14/103) | 9% (9/103)  | 1% (1/103)    | 12% (12/103)  |
|                      | NCT02431247                   | [27] | 5% (19/362)  | NA          | NA            | 9% (32/362)   |
| TAF+FTC+DTG          | NCT03122262                   | [28] | NA           | NA          | NA            | NA            |
|                      | NCT02397694                   | [24] | 6% (2/33)    | 6% (2/33)   | 0% (0/33)     | NA            |
|                      | NCT02607956                   | [22] | 8% (26/325)  | 3% (9/325)  | 6% (20/325)   | NA            |
|                      | NCT03110380                   | [20] | 3% (8/281)   | 6% (17/281) | 4% (11/281)   | NA            |
| TDF+FTC+EVG/c        | NCT01095796                   | [29] | 11% (40/348) | NA          | NA            | 6% (22/348)   |

|             |                            |      |               |             |               |             |
|-------------|----------------------------|------|---------------|-------------|---------------|-------------|
|             | NCT01106586                | [30] | 14% (50/353)  | NA          | NA            | NA          |
|             | NCT01780506<br>NCT01797445 | [14] | 8% (71/867)   | 5% (39/867) | 7% (57/867)   | 5% (46/867) |
|             | NCT01497899                | [13] | 9% (5/58)     | NA          | 10% (6/58)    | 5% (3/58)   |
|             | NCT02616783                | [17] | NA            | 7% (4/56)   | NA            | NA          |
| DTG+3TC     | NCT02831673<br>NCT02831764 | [31] | NA            | 2% (15/716) | 5% (35/716)   | NA          |
|             | NCT02263326                | [32] | NA            | NA          | NA            | NA          |
|             | NCT03446573                | [33] | 5.4% (20/369) | NA          | 5.7% (21/369) | NA          |
| ABC+3TC+DTG | NCT01263015                | [34] | NA            | NA          | NA            | 1% (3/414)  |
|             | NCT02607930                | [23] | 9% (27/315)   | 6% (19/315) | NA            | NA          |
|             | NCT02603120                | [18] | NA            | 4% (10/281) | NA            | NA          |
|             | NCT02938520                | [7]  | NA            | NA          | 5% (13/283)   | NA          |
|             | NCT02105987                | [35] | 8% (22/275)   | NA          | NA            | NA          |

TN: treatment-naïve, VS: virologically suppressed.

## References

- Orkin C, DeJesus E, Ramgopal M, Crofoot G, Ruane P, LaMarca A, Mills A, Vandercam B, de Wet J, Rockstroh J, et al: Switching from tenofovir disoproxil fumarate to tenofovir alafenamide coformulated with rilpivirine and emtricitabine in virally suppressed adults with HIV-1 infection: a randomised, double-blind, multicentre, phase 3b, non-inferiority study. *Lancet HIV* 2017, **4**:e195-e204.
- Molina JM, Cahn P, Grinsztejn B, Lazzarin A, Mills A, Saag M, Supparatpinoy K, Walmsley S, Crauwels H, Rimsky LT, et al: Rilpivirine versus efavirenz with tenofovir and emtricitabine in treatment-naïve adults infected with HIV-1 (ECHO): a phase 3 randomised double-blind active-controlled trial. *Lancet* 2011, **378**:238-246.
- Cohen C, Wohl D, Arribas JR, Henry K, Van Lunzen J, Bloch M, Towner W, Wilkins E, Ebrahimi R, Porter D, et al: Week 48 results from a randomized clinical trial of rilpivirine/emtricitabine/tenofovir disoproxil fumarate vs. efavirenz/emtricitabine/tenofovir disoproxil fumarate in treatment-naïve HIV-1-infected adults. *Aids* 2014, **28**:989-997.
- DeJesus E, Ramgopal M, Crofoot G, Ruane P, LaMarca A, Mills A, Martorell CT, de Wet J, Stellbrink HJ, Molina JM, et al: Switching from efavirenz, emtricitabine, and tenofovir disoproxil fumarate to tenofovir alafenamide coformulated with rilpivirine and emtricitabine in virally suppressed adults with HIV-1 infection: a randomised, double-blind, multicentre, phase 3b, non-inferiority study. *Lancet HIV* 2017, **4**:e205-e213.
- Llibre JM, Hung CC, Brinson C, Castelli F, Girard PM, Kahl LP, Blair EA, Angelis K, Wynne B, Vandermeulen K, et al: Efficacy, safety, and tolerability of dolutegravir-rilpivirine for the maintenance of virological suppression in adults with HIV-1: phase 3, randomised, non-inferiority SWORD-1 and SWORD-2 studies. *Lancet* 2018, **391**:839-849.
- Swindells S, Andrade-Villanueva JF, Richmond GJ, Rizzardini G, Baumgarten A, Masia M, Latiff G, Pokrovsky V, Bredeek F, Smith G, et al: Long-Acting Cabotegravir and Rilpivirine for Maintenance of HIV-1 Suppression. *N Engl J Med* 2020, **382**:1112-1123.
- Orkin C, Arasteh K, Górgolas Hernández-Mora M, Pokrovsky V, Overton ET, Girard PM, Oka S, Walmsley S, Bettacchi C, Brinson C, et al: Long-Acting Cabotegravir and Rilpivirine after Oral Induction for HIV-1 Infection. *N Engl J Med* 2020, **382**:1124-1135.
- Margolis DA, Gonzalez-Garcia J, Stellbrink HJ, Eron JJ, Yazdanpanah Y, Podzamczar D, Lutz T, Angel JB, Richmond GJ, Clotet B, et al: Long-acting intramuscular cabotegravir and rilpivirine in adults with HIV-1 infection (LATTE-2): 96-week results of a randomised, open-label, phase 2b, non-inferiority trial. *Lancet* 2017, **390**:1499-1510.
- Overton ET, Richmond G, Rizzardini G, Jaeger H, Orrell C, Nagimova F, Bredeek F, García Deltoro M, Swindells S, Andrade-Villanueva JF, et al: Long-acting cabotegravir and rilpivirine dosed every 2 months in adults with HIV-1 infection (ATLAS-2M), 48-week results: a randomised, multicentre, open-label, phase 3b, non-inferiority study. *Lancet*

2021, **396**:1994-2005.

10. Molina JM, Squires K, Sax PE, Cahn P, Lombaard J, DeJesus E, Lai MT, Xu X, Rodgers A, Lupinacci L, et al: Doravirine versus ritonavir-boosted darunavir in antiretroviral-naive adults with HIV-1 (DRIVE-FORWARD): 48-week results of a randomised, double-blind, phase 3, non-inferiority trial. *Lancet HIV* 2018, **5**:e211-e220.
11. Orkin C, Squires KE, Molina JM, Sax PE, Wong WW, Sussmann O, Kaplan R, Lupinacci L, Rodgers A, Xu X, et al: Doravirine/Lamivudine/Tenofovir Disoproxil Fumarate is Non-inferior to Efavirenz/Emtricitabine/Tenofovir Disoproxil Fumarate in Treatment-naive Adults With Human Immunodeficiency Virus-1 Infection: Week 48 Results of the DRIVE-AHEAD Trial. *Clin Infect Dis* 2019, **68**:535-544.
12. Johnson M, Kumar P, Molina JM, Rizzardini G, Cahn P, Bickel M, Mallolas J, Zhou Y, Morais C, Kumar S, et al: Switching to Doravirine/Lamivudine/Tenofovir Disoproxil Fumarate (DOR/3TC/TDF) Maintains HIV-1 Virologic Suppression Through 48 Weeks: Results of the DRIVE-SHIFT Trial. *J Acquir Immune Defic Syndr* 2019, **81**:463-472.
13. Sax PE, Zolopa A, Brar I, Elion R, Ortiz R, Post F, Wang H, Callebaut C, Martin H, Fordyce MW, McCallister S: Tenofovir alafenamide vs. tenofovir disoproxil fumarate in single tablet regimens for initial HIV-1 therapy: a randomized phase 2 study. *J Acquir Immune Defic Syndr* 2014, **67**:52-58.
14. Sax PE, Wohl D, Yin MT, Post F, DeJesus E, Saag M, Pozniak A, Thompson M, Podzamczar D, Molina JM, et al: Tenofovir alafenamide versus tenofovir disoproxil fumarate, coformulated with elvitegravir, cobicistat, and emtricitabine, for initial treatment of HIV-1 infection: two randomised, double-blind, phase 3, non-inferiority trials. *Lancet* 2015, **385**:2606-2615.
15. Hodder S, Squires K, Kityo C, Hagins D, Avihingsanon A, Kido A, Jiang S, Kulkarni R, Cheng A, Cao H: **Brief Report:** Efficacy and Safety of Switching to Coformulated Elvitegravir, Cobicistat, Emtricitabine, and Tenofovir Alafenamide (E/C/F/TAF) in Virologically Suppressed Women. *J Acquir Immune Defic Syndr* 2018, **78**:209-213.
16. Mills A, Arribas JR, Andrade-Villanueva J, DiPerri G, Van Lunzen J, Koenig E, Elion R, Cavassini M, Madruga JV, Brunetta J, et al: Switching from tenofovir disoproxil fumarate to tenofovir alafenamide in antiretroviral regimens for virologically suppressed adults with HIV-1 infection: a randomised, active-controlled, multicentre, open-label, phase 3, non-inferiority study. *Lancet Infect Dis* 2016, **16**:43-52.
17. Maggiolo F, Rizzardini G, Raffi F, Pulido F, Mateo-Garcia MG, Molina JM, Ong E, Shao Y, Piontkowsky D, Das M, et al: Bone mineral density in virologically suppressed people aged 60 years or older with HIV-1 switching from a regimen containing tenofovir disoproxil fumarate to an elvitegravir, cobicistat, emtricitabine, and tenofovir alafenamide single-tablet regimen: a multicentre, open-label, phase 3b, randomised trial. *Lancet HIV* 2019, **6**:e655-e666.
18. Molina JM, Ward D, Brar I, Mills A, Stellbrink HJ, Lopez-Cortes L, Ruane P, Podzamczar D, Brinson C, Custodio J, et al: Switching to fixed-dose bicittegravir, emtricitabine, and tenofovir alafenamide from dolutegravir plus abacavir and lamivudine in virologically suppressed adults with HIV-1: 48 week results of a randomised, double-blind, multicentre, active-controlled, phase 3, non-inferiority trial. *Lancet HIV* 2018, **5**:e357-e365.
19. Kityo C, Hagins D, Koenig E, Avihingsanon A, Chetchotisakd P, Supparatpinyo K, Gankina N, Pokrovsky V, Voronin E, Stephens JL, et al: Switching to Fixed-Dose Bicittegravir, Emtricitabine, and Tenofovir Alafenamide (B/F/TAF) in Virologically Suppressed HIV-1 Infected Women: A Randomized, Open-Label, Multicenter, Active-Controlled, Phase 3, Noninferiority Trial. *J Acquir Immune Defic Syndr* 2019, **82**:321-328.
20. Sax PE, Rockstroh JK, Luetkemeyer AF, Yazdanpanah Y, Ward D, Trottier B, Rieger A, Liu H, Acosta R, Collins SE, et al: Switching to bicittegravir, emtricitabine, and tenofovir alafenamide in virologically suppressed adults with HIV. *Clin Infect Dis* 2020:ciaa988.
21. Daar ES, DeJesus E, Ruane P, Crofoot G, Oguchi G, Creticos C, Rockstroh JK, Molina JM, Koenig E, Liu YP, et al: Efficacy and safety of switching to fixed-dose bicittegravir, emtricitabine, and tenofovir alafenamide from boosted protease inhibitor-based regimens in virologically suppressed adults with HIV-1: 48 week results of a randomised, open-label, multicentre, phase 3, non-inferiority trial. *Lancet HIV* 2018, **5**:e347-e356.

22. Sax PE, Pozniak A, Montes ML, Koenig E, DeJesus E, Stellbrink HJ, Antinori A, Workowski K, Slim J, Reynes J, et al: Coformulated bicitegravir, emtricitabine, and tenofovir alafenamide versus dolutegravir with emtricitabine and tenofovir alafenamide, for initial treatment of HIV-1 infection (GS-US-380-1490): a randomised, double-blind, multicentre, phase 3, non-inferiority trial. *Lancet* 2017, **390**:2073-2082.
23. Gallant J, Lazzarin A, Mills A, Orkin C, Podzamczek D, Tebas P, Girard PM, Brar I, Daar ES, Wohl D, et al: Bicitegravir, emtricitabine, and tenofovir alafenamide versus dolutegravir, abacavir, and lamivudine for initial treatment of HIV-1 infection (GS-US-380-1489): a double-blind, multicentre, phase 3, randomised controlled non-inferiority trial. *Lancet* 2017, **390**:2063-2072.
24. Sax PE, DeJesus E, Crofoot G, Ward D, Benson P, Dretler R, Mills A, Brinson C, Peloquin J, Wei X, et al: Bicitegravir versus dolutegravir, each with emtricitabine and tenofovir alafenamide, for initial treatment of HIV-1 infection: a randomised, double-blind, phase 2 trial. *Lancet HIV* 2017, **4**:e154-e160.
25. Orkin C, Molina JM, Negredo E, Arribas JR, Gathe J, Eron JJ, Van Landuyt E, Lathouwers E, Hufkens V, Petrovic R, et al: Efficacy and safety of switching from boosted protease inhibitors plus emtricitabine and tenofovir disoproxil fumarate regimens to single-tablet darunavir, cobicistat, emtricitabine, and tenofovir alafenamide at 48 weeks in adults with virologically suppressed HIV-1 (EMERALD): a phase 3, randomised, non-inferiority trial. *Lancet HIV* 2018, **5**:e23-e34.
26. Mills A, Crofoot G, Jr., McDonald C, Shalit P, Flamm JA, Gathe J, Jr., Scribner A, Shamblaw D, Saag M, Cao H, et al: Tenofovir Alafenamide Versus Tenofovir Disoproxil Fumarate in the First Protease Inhibitor-Based Single-Tablet Regimen for Initial HIV-1 Therapy: A Randomized Phase 2 Study. *J Acquir Immune Defic Syndr* 2015, **69**:439-445.
27. Eron JJ, Orkin C, Gallant J, Molina JM, Negredo E, Antinori A, Mills A, Reynes J, Van Landuyt E, Lathouwers E, et al: A week-48 randomized phase-3 trial of darunavir/cobicistat/emtricitabine/tenofovir alafenamide in treatment-naive HIV-1 patients. *AIDS* 2018, **32**:1431-1442.
28. Venter WDF, Moorhouse M, Sokhela S, Fairlie L, Mashabane N, Masenya M, Serenata C, Akpomiemie G, Qavi A, Chandiwana N, et al: Dolutegravir plus Two Different Prodrugs of Tenofovir to Treat HIV. *N Engl J Med* 2019, **381**:803-815.
29. Sax PE, DeJesus E, Mills A, Zolopa A, Cohen C, Wohl D, Gallant JE, Liu HC, Zhong L, Yale K, et al: Co-formulated elvitegravir, cobicistat, emtricitabine, and tenofovir versus co-formulated efavirenz, emtricitabine, and tenofovir for initial treatment of HIV-1 infection: a randomised, double-blind, phase 3 trial, analysis of results after 48 weeks. *Lancet* 2012, **379**:2439-2448.
30. DeJesus E, Rockstroh JK, Henry K, Molina JM, Gathe J, Ramanathan S, Wei X, Yale K, Szwarcberg J, White K, et al: Co-formulated elvitegravir, cobicistat, emtricitabine, and tenofovir disoproxil fumarate versus ritonavir-boosted atazanavir plus co-formulated emtricitabine and tenofovir disoproxil fumarate for initial treatment of HIV-1 infection: a randomised, double-blind, phase 3, non-inferiority trial. *Lancet* 2012, **379**:2429-2438.
31. Cahn P, Madero JS, Arribas JR, Antinori A, Ortiz R, Clarke AE, Hung CC, Rockstroh JK, Girard PM, Sievers J, et al: Dolutegravir plus lamivudine versus dolutegravir plus tenofovir disoproxil fumarate and emtricitabine in antiretroviral-naive adults with HIV-1 infection (GEMINI-1 and GEMINI-2): week 48 results from two multicentre, double-blind, randomised, non-inferiority, phase 3 trials. *Lancet* 2019, **393**:143-155.
32. Taiwo BO, Marconi VC, Berzins B, Moser CB, Nyaku AN, Fichtenbaum CJ, Benson CA, Wilkin T, Koletar SL, Colasanti J, et al: Dolutegravir Plus Lamivudine Maintains Human Immunodeficiency Virus-1 Suppression Through Week 48 in a Pilot Randomized Trial. *Clin Infect Dis* 2018, **66**:1794-1797.
33. van Wyk J, Ajana F, Bisshop F, De Wit S, Osiyemi O, Portilla Sogorb J, Routy JP, Wyen C, Ait-Khaled M, Nascimento MC, et al: Efficacy and Safety of Switching to Dolutegravir/Lamivudine Fixed-Dose 2-Drug Regimen vs Continuing a Tenofovir Alafenamide-Based 3- or 4-Drug Regimen for Maintenance of Virologic Suppression in Adults Living With Human Immunodeficiency Virus Type 1: Phase 3, Randomized, Noninferiority TANGO Study. *Clin Infect Dis* 2020, **71**:1920-1929.

34. Walmsley SL, Antela A, Clumeck N, Duiculescu D, Eberhard A, Gutiérrez F, Hocqueloux L, Maggiolo F, Sandkovsky U, Granier C, et al: Dolutegravir plus abacavir-lamivudine for the treatment of HIV-1 infection. *N Engl J Med* 2013, **369**:1807-1818.
35. Trottier B, Lake JE, Logue K, Brinson C, Santiago L, Brennan C, Koteff JA, Wynne B, Hopking J, Granier C, Aboud M: Dolutegravir/abacavir/lamivudine versus current ART in virally suppressed patients (STRIVING): a 48-week, randomized, non-inferiority, open-label, Phase IIIb study. *Antivir Ther* 2017, **22**:295-305.
